# Supplementary material for: Renewable camphor-derived hydroperoxide: synthesis and use in the asymmetric epoxidation of allylic alcoholsElectronic supplementary information (ESI) available: experimental details. See http://www.rsc.org/suppdata/cc/b3/b303904h/
Source: Royal Society of Chemistry journal article supplement (doi:10.1039/b303904h), 2003-01-01
Supplement: b303904h.doc [file b303904h.doc]

##### Supplementary Information

Renewable camphor-derived hydroperoxide: synthesis and use in the asymmetric epoxidation of allylic alcohols

#### Alessandra Lattanzi,* Patrizia Iannece, Assunta Vicinanza and Arrigo Scettri

Dipartimento di Chimica, Università di Salerno, Via S. Allende I, 84081 Baronissi, Salerno, Italy

lattanzi@unisa.it

Warning. While we did not experience any problem during the course of this work, precautions should be taken when handling solutions of H2O2 and hydroperoxides.1,2

Procedure for 2-furyl lithium addition to (+)-(1*R*)-camphor

To a –20°C solution of freshly distilled furan (3.5 g, 52 mmol) in anhydrous THF (20 mL), under argon atmosphere, was added *n*-BuLi (22 mL, 55 mmol, 2.5 M solution in hexane). The reaction temperature was allowed to warm to room temperature and stirring was mantained for 2 h. Then, the temperature was cooled to 0°C and a solution of (+)-(1*R*)-camphor (2.3 g, 15 mmol) in anhydrous THF (15 mL) was added. The reaction temperature was gradually warmed to 50 °C and the mixture stirred overnight. The cooled mixture was diluted with diethyl ether (50 mL) and quenched by slow addition at room temperature of a saturated solution of ammonium chloride. The layers were separated and the aqueous layer was extracted with diethyl ether (3 x 50 mL). The combined organic layers were washed with brine (2 x 50 mL) and dried over sodium sulfate. Unreacted camphor was removed by sublimation under reduced pressure (0.05 Torr) at 50 °C overnight. Then, the crude mixture was purified by flash chromatography (petrol/diethyl ether 95/5) to give 1.

(1*R*, 2*R*, 4*R*)-2-*exo*-Hydroxy-2-*endo*-(2’-furyl)-1,7,7-trimethylbicyclo[2.2.1] heptane (*exo*-1) 1.9 g (58%), pale yellow oil. 39.4 (*c*= 1.58, CHCl3); 1H NMR  7.35 (d, 1H, *J* 1.7), 6.30 (m, 1H), 6.24 (d, 1H, *J* 3.2), 2.21 ((dt, 1H, *J* 13.6, 3.7), 2.18 (bs, 1H), 2.09 (d, 1H, *J* 13.6), 1.82 (t, 1H, *J* 4.4), 1.71-1.65 (m, 1H), 1.33-1.26 (m, 1H), 1.18 (s, 3H), 1.12-1.08 (m, 1H), 1.07 (s, 3H), 0.88 (s, 3H), 0.74-0.71 (m, 1H). 13C NMR  159.6, 141.4, 109.7, 105.5, 80.3, 53.5, 49.0, 45.0, 43.8, 31.2, 26.7, 21.2, 20.9, 10.4. IR (KBr): 3482 (br), 2927, 1500, 1458, 1220, 731 cm-1. MS (EI) *m*/*z* 220 (M+, 8%), 203 (55), 176 (48), 149 (22), 110 (100), 95 (30), 81 (28). Anal. Calcd for C14H20O2: C, 76.33; H, 9.15. Found: C, 76.20; H, 9.24.

**(1*R*, 2*S*, 4*R*)-2-*endo*-Hydroxy-2-*exo*-(2’-furyl)-1,7,7-trimethylbicyclo[2.2.1] heptane** (*endo*-**1**) 58 mg (1.8%) pale yellow oil. 6.0 (*c*= 1.58, CHCl3); 1H NMR  7.34 (d, 1H, *J* 1.8), 6.32 (m, 1H), 6.26 (d, 1H, *J* 3.0), 2.78 (dt, 1H, *J* 13.7, 3.7), 2.35 (m, 1H), 1.91 (bs, 1H), 1.79 (m, 2H), 1.50 (d, 1H, *J* 13.7), 1.38 (m, 2H), 0.98 (s, 3H), 0.88 (s, 3H), 0.76 (s, 3H). 13C NMR  160.2, 140.9, 110.0, 106.5, 79.0, 54.9, 49.6, 44.9, 43.5, 29.8, 27.2, 21.5, 19.8, 13.1. IR (KBr): 3476 (br), 2956, 1728, 1455, 1288, 733 cm-1. MS (EI) *m*/*z* 220 (M+, 10%), 203 (100), 174 (64), 149 (76), 110 (68), 95 (38), 81 (29). Anal. Calcd for C14H20O2: C, 76.33; H, 9.15. Found: C, 76.45; H, 9.03.

Procedure for the synthesis of *exo*-2 from *exo*-1 using Amberlyst-15 and UHP

To a solution of *exo*-1 (400 mg, 1.8 mmol) in anhydrous THF (18 mL), under argon atmosphere, were added UHP (3.4 g, 36 mmol) and Amberlyst-15 (400 mg, 100% weight with respect to 1). The heterogeneous mixture was stirred for 24 h at room temperature. Then, it was throughly filtered over celite with petrol. After evaporation of the solvent, the crude residue was dissolved in petrol, washed with water (8 x 20 mL) and the organic phase was dried over sodium sulfate. The solvent was removed under reduced pressure and the crude product was purified by flash chromatography (petrol/diethyl ether 98/2) to give *exo*-2 and 3.

Procedure for the synthesis of *exo*-2 from *exo*-1 using Amberlyst-15 and 50% aqueous H2O2

To a solution of *exo*-**1** (400 mg, 1.8 mmol) in anhydrous THF (18 mL), under argon atmosphere, were added 50% aqueous H2O2 (1 mL, 18 mmol) and Amberlyst-15 (400 mg, 100% weight with respect to **1**). The heterogeneous mixture was stirred for 18 h at room temperature. The crude mixture was diluted with diethyl ether (20 mL) and washed with water (3 x 20 mL), then the organic phase was dried over sodium sulfate. The solvent was removed under reduced pressure and the crude product was purified by flash chromatography (petrol/diethyl ether 98/2) to give *exo*-**2** and **3**. From 1H NMR the distribution is >98% *exo*-**2**/ <2% *endo*-**2**. It has to be noted that reaction times can be shortened by performing the reaction at 45 °C.

(1*R*, 2*R*, 4*R*)-2-*exo*-Hydroperoxy-2-*endo*-(2’-furyl)-1,7,7-trimethylbicyclo[2.2.1] heptane (*exo*-2) 255 mg (60%) pale orange dense oil. 50.4 (*c*= 1.00, CHCl3); 1H NMR  7.42 (d, 1H, *J* 1.5), 7.14 (bs, 1H), 6.39-6.37 (m, 2H), 2.57 (dt, 1H, *J* 13.9, 1.8), 2.04 (d, 1H, *J* 13.9), 1.89 (t, 1H, *J* 4.4), 1.72-1.67 (m, 1H), 1.29-1.23 (m, 2H), 1.16 (s, 3H), 0.98 (s, 3H), 0.88 (s, 3H), 0.80-0.77 (m, 1H). 13C NMR  156.0, 141.9, 110.0, 108.1, 92.3, 55.6, 49.2, 45.0, 38.7, 32.1, 26.7, 21.0, 20.9, 10.0. IR (KBr): 3400 (br), 2924, 2854, 1461, 1261, 1015, 800 cm-1. MS (EI) *m*/*z* 236 (M+, 4%), 219 (100), 203 (28), 147 (30), 133 (44), 109 (84), 95 (32), 67 (32).

(1*R*, 4*R*)-2-(2’-furyl)-1,7,7-trimethylbicyclo[2.2.1] hept-2-ene (3) 109 mg (30%) uncolored oil. 97.6 (*c*= 1.25, CHCl3); 1H NMR  7.34 (d, 1H, *J* 1.3), 6.36-6.34 (m, 1H), 6.28-6.26 (m, 2H), 2.41 (t, 1H, *J* 3.5), 1.94-1.91 (m, 1H), 1.60-1.57 (m, 1H), 1.25 (s, 3H), 1.14-1.04 (m, 2H), 0.85 (s, 3H), 0.82 (s, 3H). 13C NMR  151.7, 140.9, 138.8, 130.0, 110.8, 105.1, 56.8, 54.0, 51.4, 31.8, 25.5, 19.6, 19.4, 12.9. IR (KBr): 2955, 2873, 1483, 1472, 1202, 1031, 729 cm-1. MS (EI) *m*/*z* 202 (M+, 60%), 187 (32), 174 (100), 159 (74), 131 (42), 115 (31), 91 (38). Anal. Calcd for C14H18O: C, 83.12; H, 8.97. Found: C, 83.00; H, 9.09.

Procedure for the synthesis of *exo*-2 from *endo*-1 using Amberlyst-15 and 50% aqueous H2O2

To a solution of *endo*-1 (200 mg, 0.9 mmol) in anhydrous THF (9 mL), under argon atmosphere, were added 50% aqueous H2O2 (0.5 mL, 9 mmol) and Amberlyst-15 (200 mg, 100% weight with respect to 1). The heterogeneous mixture was stirred for 28 h at room temperature. The crude mixture was diluted with diethyl ether (10 mL) and washed with water (3 x 10 mL), then the organic phase was dried over sodium sulfate. The solvent was removed under reduced pressure and the crude product was purified by flash chromatography (petrol/diethyl ether 98/2) to give *exo*-2 (74 mg, 35%) and 3 (91 mg, 50%).

Procedure of reduction of *exo*-2 to *exo*-1 with Ph3P

Triphenyl phosphine (70 mg, 0.296 mmol) was added to a solution of hydroperoxide *exo*-2 (71 mg, 0.3 mmol) in anhydrous benzene (10 mL) at room temperature under argon atmosphere. The reaction mixture was stirred for 30 min. until completion (monitored by TLC), then the solvent removed under reduced pressure. The crude product was purified by flash chromatography (petrol/diethyl ether 90/10) to give 1 (53 mg, 81%), whose spectral data and specific optical rotation matched with *exo*-1.

Procedure for phenylmagnesium bromide addition to (+)-(1*R*)-camphor

The synthesis was performed according to the literature.3 (1*R*, 2*R*, 4*R*)-2-*exo*-Hydroxy-2-*endo*-phenyl-1,7,7-trimethylbicyclo[2.2.1] heptane (*exo*-4) has been reported.3

Procedure for the treatment of *exo*-4 with Amberlyst-15 and 50% aqueous H2O2

A representative example of experimental procedure is given. To a solution of *exo*-4 (180 mg, 0.783 mmol) in anhydrous THF (8 mL), under argon atmosphere, were added 50% aqueous H2O2 (0.440 mL, 7.8 mmol) and Amberlyst-15 (360 mg, 200% weight with respect to 4). The mixture was warmed at 45°C and stirring was mantained for 7 h. The crude mixture was diluted with diethyl ether (10 mL) and washed with water (3 x 10 mL), then the organic phase was dried over sodium sulfate. The solvent was removed under reduced pressure and the crude product was analyzed by 1H NMR. 1-Phenyl-camphene (5)4 and 2-phenyl-2-bornene (6)5 have been reported.

Procedure for the asymmetric epoxidation of allylic alcohols 7 by *exo*-2

To a solution of dry CH2Cl2 (2 mL), under argon atmosphere at –20 °C, are added MS 4Å (100% weight with respect to *exo*-2) and Ti(O*i*-Pr)4 (147 L, 0.5 mmol). Then, a solution of *exo*-2 (118 mg, 0.75 mmol) in CH2Cl2 (3 mL) was added. The mixture was stirred for 1 h and then a solution of the allylic alcohol 7 (0.5 mmol) in CH2Cl2 (1.3 mL) was added. The reaction mixture was strirred for the times stated in Table 3 and monitored by TLC analysis. At the end of the reaction water (0.5 mL) was added and stirring was mantained for 1 h at room temperature. After filtration with diethyl ether (20 mL) of the resulting gel over celite, the organic phase was dried over sodium sulfate, then the solvent was removed under reduced pressure. The crude reaction mixture was purified by flash chromatography (petrol/diethyl ether mixtures 90/10 to 80/20) to give epoxide 8. During the same chromatography alcohol *exo*-1 can be isolated. Spectroscopic and analytic data of epoxides 8 matched with the literature.6 The procedures for the preparation and shift study analysis of the acetates and the preparation and analysis of Mosher esters for the epoxy alcohols 8 were performed according to the literature.6b HPLC analysis on chiral column (Daicel Chiralcel OD) for compound 8e was performed according to reference 6d.

(1*S*, 2*S*, 6*R*)-4,4,6-Trimethyl-7-oxa-bicyclo[4.1.0]heptan-2-ol (8f). 18.8 (*c*= 0.86, CHCl3). Spectroscopic data of 8f matched with those reported in reference 7. E.e. and absolute configuration were determined on the corresponding Mosher esters.

3,5,5-Trimethyl-cyclohex-2-en-(1*R*)-ol (7f).

Spectroscopic data of 7f matched with those reported in reference 8. E.e. and abolute configuration were determined on the corresponding Mosher esters.

**References for Supplementary Information**

(1) Patnaik, P. *A Comprehensive Guide to the Hazardous Properties of Chemical Substances*; Van Nostrand Reinhold: New York, 1992.

(2) Shanley, E. S. In *Organic Peroxides*; Swern, D., Ed.; Wiley-Interscience: New York, 1970; Vol. 3, p 341-369.

(3) Bergdahl, M.; Nilsson, M.; Olsson, T.; Stern, K. *Tetrahedron* 1991, *47*, 9691.

(4) Kleinfelter, D. C.; Aaron, R. W.; Gerteisen, T. J.; Miller, Jr., J. M.; Bennet, Jr., T. B. *J. Org. Chem.* 1967, *32*, 3521.

(5) Stork, G.; Isaacs, R. C. *J. Am. Chem. Soc.* **1990**, *112*, 7399.

(6) (a) Tanner, D.; H. M., He *Tetrahedron* **1989**, *45*, 4309. (b) Gao, Y.; Hanson, R. M.; Klunder, J. M.; Ko, S. Y.; Masamune, H.; Sharpless, K. B. *J. Am. Chem. Soc.* **1987**, *109*, 5765. (c) Mori, N.; Kuwahara, Y.; Kurosa, K. *Bioorg. Chem. Med.* **1996**, *4*, 289. (d) Bolm, C.; Beckmann, O.; Kühn, T.; Palazzi, C.; Adam, W.; Rao, P. B.; Saha-Möller, C. R. *Tetrahedron: Asymmetry* **2001**, *12*, 2441.

(7) Chen, J.-X.; Daeuble, J. F.; Brestensky, D. M.; Stryker, J. M. *Tetrahedron* **2000**, *56*, 2153.

(8) Dickinson, J. M.; Murphy, J. A *Tetrahedron* **1992**, *48*, 1317.
