# Supplementary figures and images for: Renewable camphor-derived hydroperoxide: synthesis and use in the asymmetric epoxidation of allylic alcoholsElectronic supplementary information (ESI) available: experimental details. See http://www.rsc.org/suppdata/cc/b3/b303904h/
Source: Royal Society of Chemistry journal article supplement (doi:10.1039/b303904h), 2003-01-01

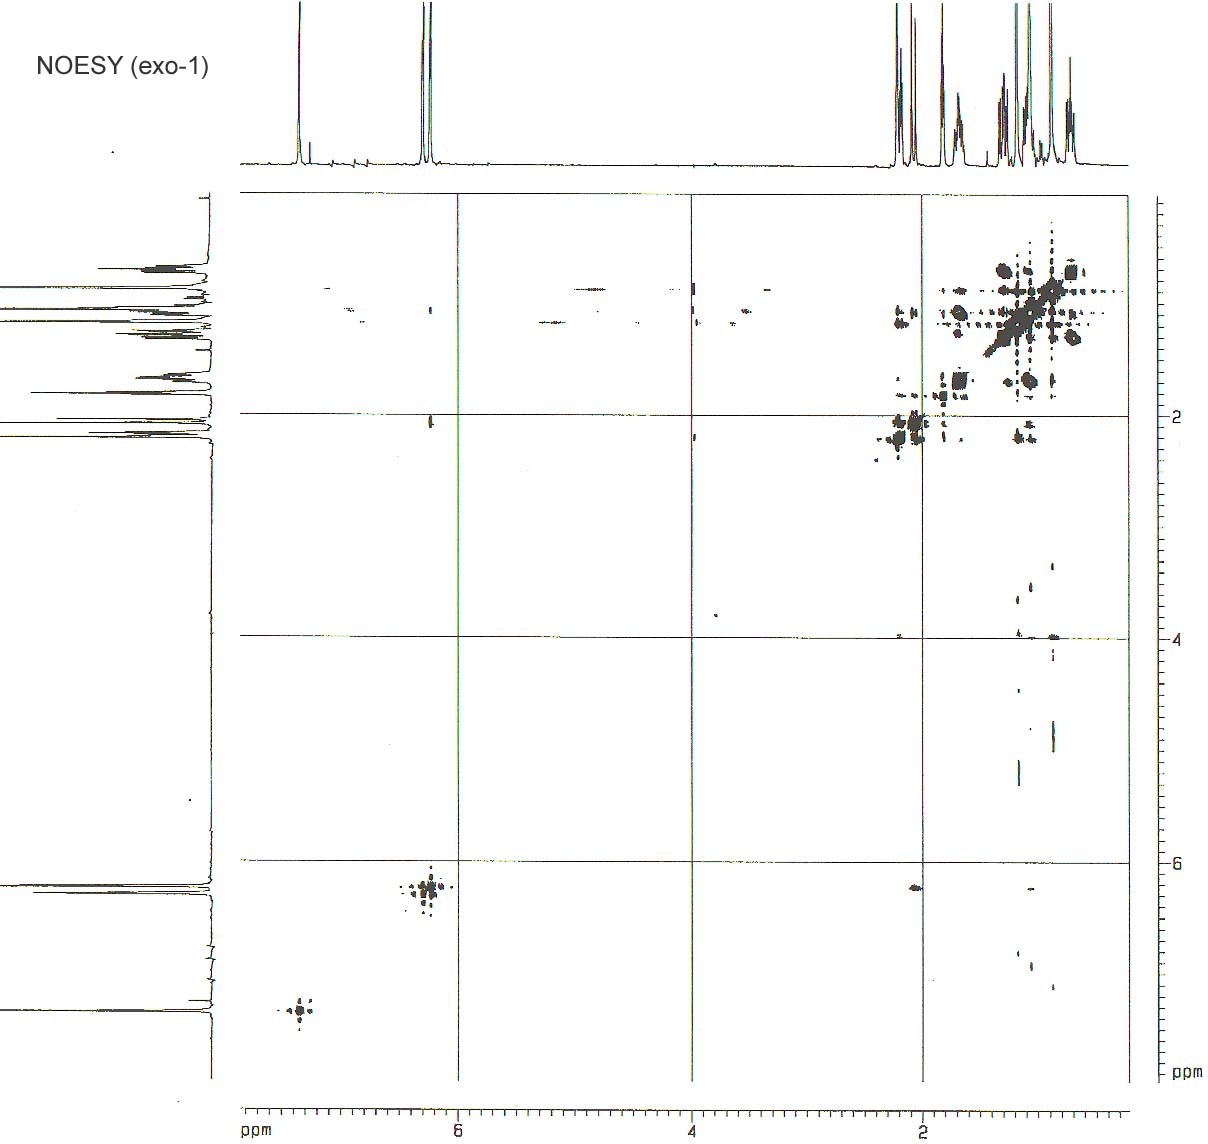


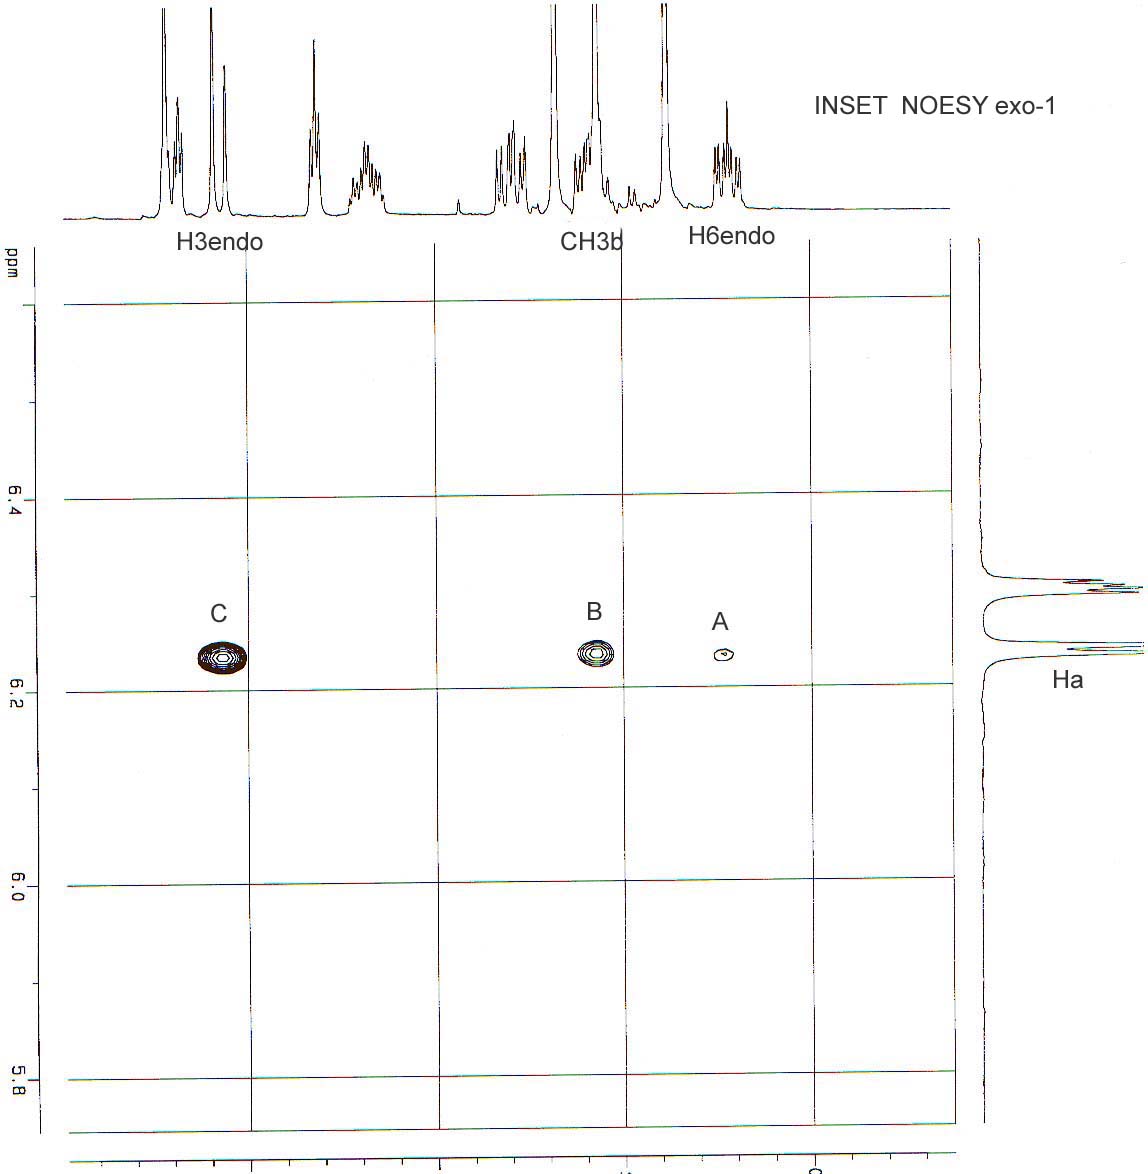

Supplement: noesy.doc [file noesy.doc]
